# Supplementary material for: Surface-initiated DNA self-assembly as an enzyme-free and nanoparticle-free strategy towards signal amplification of an electrochemical DNA sensor
Source: Royal Society of Chemistry journal article supplement (doi:10.1039/c0an00761g), 2010-11-22
Supplement: c0an00761g.pdf [file c0an00761g.pdf]

## **Electronic Supplementary Information**

### **Surface Initiated DNA Self-Assembly as an Enzyme-Free and Nanoparticle-Free Strategy toward Signal Amplification of an Electrochemical DNA Sensor**

*Yuanqin Zheng, Yulin Li, Na Lu, Zhaoxiang Deng\**

CAS Key Laboratory of Soft Matter Chemistry, Department of Chemistry, University of  
Science and Technology of China, Hefei, Anhui 230026, China

## Experiment details

### 1. DNA sequences (5'-3'):

Capture: thiol-TTTTTTTTTTGC GCGAACCGTATA

Reporter: TCTATCCTACGCTTTTTACTGGAACTAGTTGATGAAGCTG

(underline bases correspond to an initiator sequence)

Target: AGCGTAGGATAGATATACGGTTCGCGC

Target with SNP: AGCGTAGGATAGATATACGTTCGCGC (underlined is a G-to-T mutation)

L1: GTGTGCGTATTATGTCTCCTCCTCAGCTTCATCAACTAGTTCCAGT

C1: CTAGTTGATGAAGCTGGACATAATACGCACAC

L2: AGGAGGAGACATAATACGCACACACTGGAAGCTAGTTGATGAAGCTG

C2: CAGCTTCATCAACTAGGTGTGCGTATTATGTC

R1: TCGGTATTATGTCCAGCTT

R2: GCACACCTAGTTGATGAAG

All oligonucleotides were purchased from Sangon Inc. (Shanghai, China) and purified by denaturing (8 M urea) polyacrylamide gel electrophoresis (PAGE).

### 2. Assaying process:

#### *Electrode pretreatment:*

A 2 mm diameter gold disk electrode sealed in a cylindrical Kel-F tube (Shanghai Chenhua Co., China) was polished with 0.05  $\mu\text{m}$  gamma alumina slurry followed by sequential sonications in doubly distilled water (ddH<sub>2</sub>O), ethanol, and ddH<sub>2</sub>O for 10 min each. The electrode was then scanned in a 0.1 M H<sub>2</sub>SO<sub>4</sub> solution at 0.1 V s<sup>-1</sup> from -0.8 V to 0.9 V (v.s. Pt quasi-reference) until a stable background was reached. The electrode was then sonicated in ddH<sub>2</sub>O for another 10 min, blown dry with compressed high-purity nitrogen.

#### *Immobilization of capture DNA:*

A 16  $\mu\text{L}$  solution droplet containing 30 nM thiolated capture DNA (dissolved in a buffer containing 0.5 M NaCl, 20 mM Tris-HCl, 1 mM EDTA, 1 mM TCEP) was pipetted onto an inverted gold electrode and allowed to stay on the gold surface for 2 hours. During the incubation, the electrode was capped with a plastic microcentrifuge tube to avoid liquid evaporation. The electrode surface was then washed with a copious amount of ddH<sub>2</sub>O, and blown dry with nitrogen. The resulting electrode was backfilled with 1 mM 6-mercaptohexanol for 1 h to minimize nonspecific DNA adsorption.

The 2 mm diameter well-polished gold electrode modified with the capture DNA and MCH was then measured for the surface density of the capture DNA. Chronocoulometry (CC) in a low ionic strength buffer (10 mM Tris-HCl) was employed for such a determination. Trivalent [Ru(NH<sub>3</sub>)<sub>6</sub>]<sup>3+</sup> (RuHex) (50  $\mu\text{M}$ ) was used as a cationic redox indicator, which quantitatively (in a ratio of 1:3) displaced the monovalent counterions of DNA phosphate backbones. The Faradaic charge related to the reduction of surface adsorbed RuHex (related to the amount of surface DNA), together with the accumulated double layer charge, was associated with the intercept on a  $Q \sim t^{1/2}$  plot linearly

extrapolated to  $t = 0$ . After subtracting the double layer background (pre-measured by CC in the absence of RuHex) from the intercept charge, the surface coverage of DNA strands could be calculated following a literature method (A. B. Steel, T. M. Herne, M. J. Tarlov, *Anal. chem.*, 1998, **70**, 4670-4677). Typical surface density for the 24-base long capture DNA was  $1.5 \times 10^{12}$  molecules/cm<sup>2</sup> or around in our experiments.

*Target hybridization:*

The electrode modified with the capture DNA was covered by a solution containing target and reporter DNAs (10 nM reporter, target concentration varied, 0.5 M NaCl, 20 mM Tris-HCl, 1 mM EDTA) for 12 hours at 23 °C. The electrode was then rinsed with a washing buffer (0.1 M NaCl, 20 mM Tris-HCl) before any further experiments.

*Polymerization:*

On the above electrode was then spotted with a polymerization cocktail (0.25 μM M1, 0.25 μM M2, 0.75 μM R1, 0.75 μM R2, 100 mM NaCl, 5 mM MgCl<sub>2</sub>, 20 mM Tris-HCl, 1 mM EDTA, at pH 8.0). The polymerization went on at 23°C for 22 hr. After polymerization, the electrode was rinsed with a washing buffer (0.1 M NaCl, 20 mM Tris-HCl) before electrochemical measurements.

*Electrochemical measurement:*

Cyclic voltammograms were acquired on a CHI 400A electrochemical analyzer (Shanghai Chenhua Co., Ltd., China). A conventional three electrode system was employed, containing the above obtained working electrode, an Ag/AgCl (3 M KCl) reference and a platinum wire auxiliary electrode. Electrolyte solution was composed of 10 mM Tris-HCl and 5 μM [Ru(NH<sub>3</sub>)<sub>6</sub>]<sup>3+</sup>. Potential was scanned between -0.05V and -0.4V at a scan rate of 0.3 V/s.

### **3. Gel electrophoresis**

Samples were prepared as mentioned above and incubated for two hours at room temperature before being combined with 2 μl of 75% glycerol and run on a 15% non-denaturing polyacrylamide gel in 1×TAE buffer (40 mM Tris.base, 20 mM Acetic acid, 2 mM EDTA) for 1 h at 32 V/cm.
